# Supplementary material for: The Relation between Hair-Cortisol Concentration and Various Welfare Assessments of Dutch Dairy Farms
Source: PubMed Central journal article supplement (PMC7998858; doi:10.3390/ani11030821), 2021-03-15
Supplement: animals-11-00821-s001.pdf [file animals-11-00821-s001.pdf]

Supplementary Material

# The Relation Between Hair-Cortisol Concentration and Various Welfare Assessments of Dutch Dairy Farms

Frank J. C. M. van Eerdenburg <sup>1,\*</sup>, Tessa Hof <sup>2</sup>, Benthe Doeve <sup>2</sup>, Lars Ravesloot <sup>2</sup>, Elly C. Zeinstra <sup>2</sup>,  
Rebecca E. Nordquist <sup>2</sup> and Franz Josef van der Staay <sup>2</sup>

<sup>1</sup> Department of Farm animal Health, Faculty of Veterinary Medicine, Utrecht University, Yalelaan 7, 3584 CL Utrecht, The Netherlands

<sup>2</sup> Behaviour and Welfare Group, Faculty of Veterinary Medicine, Utrecht University, Yalelaan 7, 3584 CL Utrecht, The Netherlands; t.hof518@gmail.com (T.H.); benthedoeve@gmail.com (B.D.); lars.ravesloot@wur.nl (L.R.); e.c.zeinstra@uu.nl (E.C.Z.); r.e.nordquist1@uu.nl (R.E.N.); f.j.vanderstaay@uu.nl (F.J.v.d.S.)

\* Correspondence: f.j.c.m.vaneerdenburg1@uu.nl

Citation: van Eerdenburg, F.J.C.M.; Hof, T.; Doeve, B.; Ravesloot, L.; Zeinstra, E.C.; Nordquist, R.E.; van der Staay, F.J. The Relation between Hair-Cortisol Concentration and Various Welfare Assessments of Dutch Dairy Farms. *Animals* **2021**, *11*, x. <https://doi.org/10.3390/xxxxx>

Academic Editor: Paul Koene

Received: 30 January 2021

Accepted: 10 March 2021

Published: date

**Publisher's Note:** MDPI stays neutral with regard to jurisdictional claims in published maps and institutional affiliations.

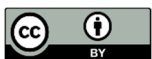

**Copyright:** © 2021 by the authors. Submitted for possible open access publication under the terms and conditions of the Creative Commons Attribution (CC BY) license (<http://creativecommons.org/licenses/by/4.0/>).

## Tables with the elements measured in all the protocols used.

**Table S1. Welzijnswijzer (WW) (=Welfare Indicator)**

|                                                             |
|-------------------------------------------------------------|
| Number of animals                                           |
| present at the farm                                         |
| with BCS < 1.5 *                                            |
| lying in alleys                                             |
| with swollen hocks                                          |
| < size of a fist                                            |
| > size of a fist                                            |
| with swollen carpal joints,...                              |
| < size of a fist                                            |
| > size of a fist                                            |
| with arthritis (swollen, painful joint)                     |
| with thickness on dorsal neck                               |
| with dirty hindquarters, size of the dirty area             |
| 25 × 25–50 × 50 cm                                          |
| 50 × 50cm–½ hindquarter                                     |
| > ½ hindquarter                                             |
| with skin infections with fungi                             |
| with scabies                                                |
| with lesions                                                |
| with clinical mastitis                                      |
| with impaired teat condition (any type of injury or damage) |
| with claw score 3 (angle > 24°)                             |
| that are severely lame                                      |
| with lameness score 1 (Sprecher score)                      |
| with lameness score 2 & 3                                   |
| with lameness score 4 & 5                                   |
| with avoidance test > 2m                                    |
| with avoidance test < 2m, but not touched                   |
| with avoidance test touched                                 |
| Number of places at the feed rack                           |
| Height of the feed rack                                     |
| Width of a feeding place at the feed rack                   |
| Quality of the drinking water                               |
| Access to the drinking water                                |
| Bedding is soft (non-painful kneetest)                      |
| Quantity of bedding                                         |
| Number of lying places                                      |
| Length of free stall                                        |
| Width of free stall                                         |
| Number with open front                                      |
| Number with closed front                                    |
| Diagonal (distance of neck rail–curb)                       |

\* Wildman, E.E.; Jones, G.M.; Wagner, P.E.; Dirkzwager, A.; Boman, R.L.; Troutt Jr., H.F.; Lesch, T.N. A dairy cow body condition scoring system and its relationship to selected production characteristics. *J Dairy Sci* **1982**, *65*, 495–501.

**Table S2. Continuous Welfare Monitor (CWM)**

|                                                   |
|---------------------------------------------------|
| Percentage cows with somatic cell count > 250,000 |
| Economic result                                   |
| Bulk milk cell count                              |
| Percentage dead cows (per annum)                  |
| Non return < 56 days                              |
| Expected calving interval                         |

**Table S3. Koekompas (KK) (=Cow Compass) (welfare related parameters)**

|                                                         |
|---------------------------------------------------------|
| Activity / fearfulness                                  |
| BCS < 2 and > 4 *                                       |
| Locomotion score 3,4,5 (Sprecher system)                |
| Hock score                                              |
| Hygiene                                                 |
| Deviant cows, rumination, manure, rumen score           |
| General impression, hair, skin lesions                  |
| High somatic cell count (number of animals)             |
| Clinical mastitis                                       |
| Claw disorders                                          |
| Metabolic disorders                                     |
| Retentio secundinarum                                   |
| Vaginitis                                               |
| Embryonic deaths                                        |
| Forced culling                                          |
| Other diseases                                          |
| number of places at the feed rack                       |
| height of the feed rack                                 |
| width of a feeding place                                |
| Softness of bedding                                     |
| quantity of bedding                                     |
| number of lying places                                  |
| length of free stall                                    |
| width of free stall                                     |
| Head space                                              |
| Cleanliness of the free stalls                          |
| Access to pasture                                       |
| Quality of the path to pasture                          |
| Barn environment: Light, ventilation, mechanical brush. |
| Quality of the feed                                     |
| Does the feed fit the group?                            |
| Quality and quantity of drinking water                  |

\* Wildman, E.E.; Jones, G.M.; Wagner, P.E.; Dirkwager, A.; Boman, R.L.; Troutt Jr., H.F.; Lesch, T.N. A dairy cow body condition scoring system and Its relationship to selected production characteristics. *J Dairy Sci* **1982**, *65*, 495-501.

**Table S4. Stall Standing Index (SSI)**

|                                                              |
|--------------------------------------------------------------|
| Percentage of cows standing with 2 or more feet in the stall |
|--------------------------------------------------------------|

**Table S5. Cow comfort scoring system (CCSS)**

|                                       |                                             |
|---------------------------------------|---------------------------------------------|
| <b>General</b>                        | <b>Concentrate Dispenser</b>                |
| Number of cows standing idle          | Number                                      |
| Fear behavior                         | Type (period-/saving system)                |
| Stretching when raising from cubicle  |                                             |
| Tail is hanging straight and relaxed  | <b>Water</b>                                |
| Bellowing                             | Number of places                            |
| Cows lying in walkways                | Type of waterer                             |
| Noise (environmental)                 | Cleanliness                                 |
|                                       | Temperature                                 |
| <b>Light</b>                          |                                             |
| Sufficient light in the barn          | <b>Waiting room and milking parlor</b>      |
| Period of light > 15 h                | Behavior                                    |
| Period of dark > 6 h                  | Time spent every milking                    |
| <b>Ventilation</b>                    | <b>Walkways and alleys</b>                  |
| It smells fresh (between the animals) | Width of the alley behind the feeding fence |
| Cobwebs                               | Width other walkways                        |
| Condense/mold                         | Sufficient passages                         |
| Barn temperature                      |                                             |
| Dead spaces                           | <b>Miscellaneous</b>                        |
| Draft                                 | Maternity pen                               |
|                                       | Sick bay                                    |
| <b>Cubicles/Free stalls</b>           | Access to pasture / outside paddock         |
| Cows are clean                        | Is there a mechanical brush?                |
| Bedding is made of inorganic material |                                             |
| Bedding is soft                       | <b>Animal health + feeding</b>              |
| Bedding is clean and dry              | Hair                                        |
| Stall surface is under a slight angle | Lameness                                    |
| Bedding is flat                       | Hocks                                       |
| Neck rail                             | Claws                                       |
| Lunge space                           | Mastitis                                    |
| Stall dimensions                      | Abomasal displacement                       |
| Brisket board                         | Filling of the rumen                        |
| Number                                | Milking fever                               |
|                                       | Acetonaemia (Ketosis)                       |
| <b>Floor</b>                          | BCS                                         |
| Slipperiness                          | Fat %                                       |
| Loose/unequal slats                   | Fertility                                   |
| Rubber                                | Calving                                     |
| Walking                               |                                             |
| Cleanliness                           |                                             |
| <b>Feeding fence</b>                  |                                             |
| Headlocks (yes or no)                 |                                             |
| Height                                |                                             |
| Number of places                      |                                             |
| Contamination of feed                 |                                             |

**Table S6. New Welfare Monitor (WM)**

| Principle    | Parameters Measured                                         |
|--------------|-------------------------------------------------------------|
| Feed & water | % very lean cows                                            |
|              | Water supply                                                |
| Housing      | Free stall dimensions                                       |
|              | Softness of bedding (with knee test)                        |
|              | Cleanliness of the cows                                     |
|              | Access to pasture (as in WQ)                                |
| Health       | Cows lying outside free stall (as in WQ)                    |
|              | Locomotion score (Sprecher system)                          |
|              | Skin lesions (as in WQ)                                     |
|              | % mastitis (milk somatic cell count > 400,000)              |
| Behaviour    | Other diseases (respiratory/metabolic/fertility) (as in WQ) |
|              | Avoidance distance at the feeding fence (as in WQ)          |
|              | Possibilities for expression of normal behaviour (as in WQ) |

**Table S7. Welfare Quality (WQ)**

|                                                  |                                                        |
|--------------------------------------------------|--------------------------------------------------------|
| Number of lactating cows                         |                                                        |
| Type of housing (loose vs tied)                  |                                                        |
| <b>Feeding</b>                                   | <b>Behaviour</b>                                       |
| % very lean cows                                 | Frequency of butts per cow per hour                    |
| Number/length/flow of water troughs sufficient?  | Frequency of other aggressive events                   |
| At least 2 water bowls available for each cow    | % cows that can be touched                             |
| Are the drinkers clean?                          | % cows that can be approached by 50 cm but not touched |
| <b>Housing</b>                                   | % cows that can be approached between 50 cm and 1 m    |
| Duration of lying down movements (in sec)        | % cows that can't be approached                        |
| % lying down movements with collisions           | Tendency to be active                                  |
| % lying cows which lie partly outside lying area | Tendency to be relaxed                                 |
| % cows with dirty lower legs                     | Tendency to be fearful                                 |
| % cows with dirty udder                          | Tendency to be agitated                                |
| % cows with dirty flank and upper legs           | Tendency to be calm                                    |
| Number of days with access to OLA per year       | Tendency to be content                                 |
| Number of hours with access to OLA per day       | Tendency to be indifferent                             |
| Number of days on pasture per year               | Tendency to be frustrated                              |
| Number of hours on pasture per day               | Tendency to be friendly                                |
| <b>Health</b>                                    | Tendency to be bored                                   |
| % not lame cows                                  | Tendency to be playful                                 |
| % moderately lame cows                           | Tendency to be positively occupied                     |
| % severely lame cows                             | Tendency to be lively                                  |
| % cows with no integument alterations            | Tendency to be inquisitive                             |
| Number of hairless patches per cow               | Tendency to be irritable                               |
| Number of lesions + swellings per cow            | Tendency to be uneasy                                  |
| Frequency of coughing per cow per 15 min         | Tendency to be sociable                                |
| % cows with nasal discharge                      | Tendency to be apathetic                               |
| % cows with ocular discharge                     | Tendency to be happy                                   |
| % cows with increased respiratory rate           | Tendency to be distressed                              |
| % cows with diarrhoea                            |                                                        |
| % cows with vulvar discharge                     |                                                        |
| % mastitis (milk somatic cell count > 400,000)   |                                                        |
| % mortality during the last 12 months            |                                                        |

|                                      |
|--------------------------------------|
| % dystocia                           |
| % downer cows                        |
| % dehorned cows                      |
| Method used for dehorning            |
| Use of anaesthetics for dehorning    |
| Use of analgesics for dehorning      |
| % tail-docked cows                   |
| Method used for tail-docking         |
| Use of anaesthetics for tail docking |
| Use of analgesics for tail docking   |

**Table S8. Modified Welfare Quality (WQ Mod)**

|                                                  |                                                        |
|--------------------------------------------------|--------------------------------------------------------|
| Number of lactating cows                         |                                                        |
| Type of housing (loose vs tied)                  |                                                        |
| <b>Feeding</b>                                   | <b>Behaviour</b>                                       |
| % very lean cows                                 | Frequency of butts per cow per hour                    |
| Number/length/flow of water troughs sufficient?  | Frequency of other aggressive events                   |
| At least 2 water bowls available for each cow    | % cows that can be touched                             |
| Are the drinkers clean?                          | % cows that can be approached by 50 cm but not touched |
| <b>Housing</b>                                   | % cows that can be approached between 50 cm and 1 m    |
| Duration of lying down movements (in sec)        | % cows that can't be approached                        |
| % lying down movements with collisions           |                                                        |
| % lying cows which lie partly outside lying area |                                                        |
| % cows with dirty lower legs                     |                                                        |
| % cows with dirty udder                          |                                                        |
| % cows with dirty flank and upper legs           |                                                        |
| Number of days with access to OLA per year       |                                                        |
| Number of hours with access to OLA per day       |                                                        |
| Number of days on pasture per year               |                                                        |
| Number of hours on pasture per day               |                                                        |
| <b>Health</b>                                    |                                                        |
| % not lame cows                                  |                                                        |
| % moderately lame cows                           |                                                        |
| % severely lame cows                             |                                                        |
| % cows with no integument alterations            |                                                        |
| Number of hairless patches per cow               |                                                        |
| Number of lesions + swellings per cow            |                                                        |
| Frequency of coughing per cow per 15 min         |                                                        |
| % cows with nasal discharge                      |                                                        |
| % cows with ocular discharge                     |                                                        |
| % cows with increased respiratory rate           |                                                        |
| % cows with diarrhoea                            |                                                        |
| % cows with vulvar discharge                     |                                                        |
| % mastitis (milk somatic cell count > 400,000)   |                                                        |
| % mortality during the last 12 months            |                                                        |
| % dystocia                                       |                                                        |
| % downer cows                                    |                                                        |
| % dehorned cows                                  |                                                        |
| Method used for dehorning                        |                                                        |
| Use of anaesthetics for dehorning                |                                                        |

---

|                                      |
|--------------------------------------|
| Use of analgesics for dehorning      |
| % tail-docked cows                   |
| Method used for tail-docking         |
| Use of anaesthetics for tail docking |
| Use of analgesics for tail docking   |
